# Supplementary material for: Aging-related inflammation driven by cellular senescence enhances NAD consumption via activation of CD38+ pro-inflammatory macrophages
Source: bioRxiv or medRxiv preprint supplement (doi:10.1101/609438), 2019-07-31

# Sup Figure 1

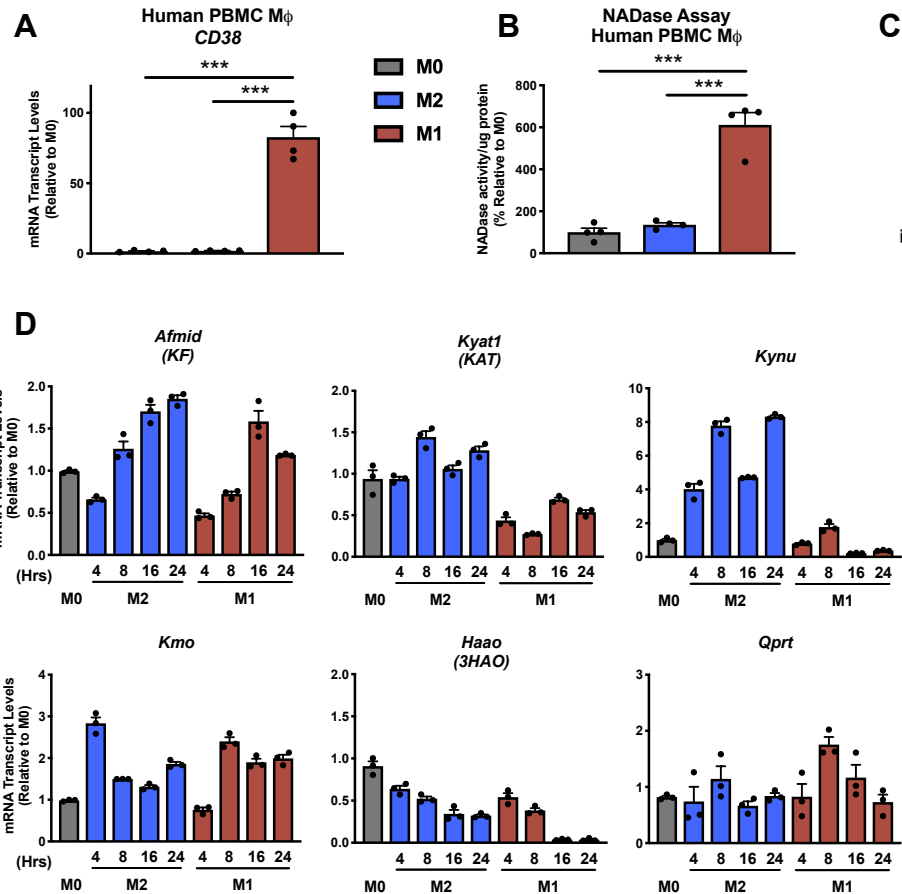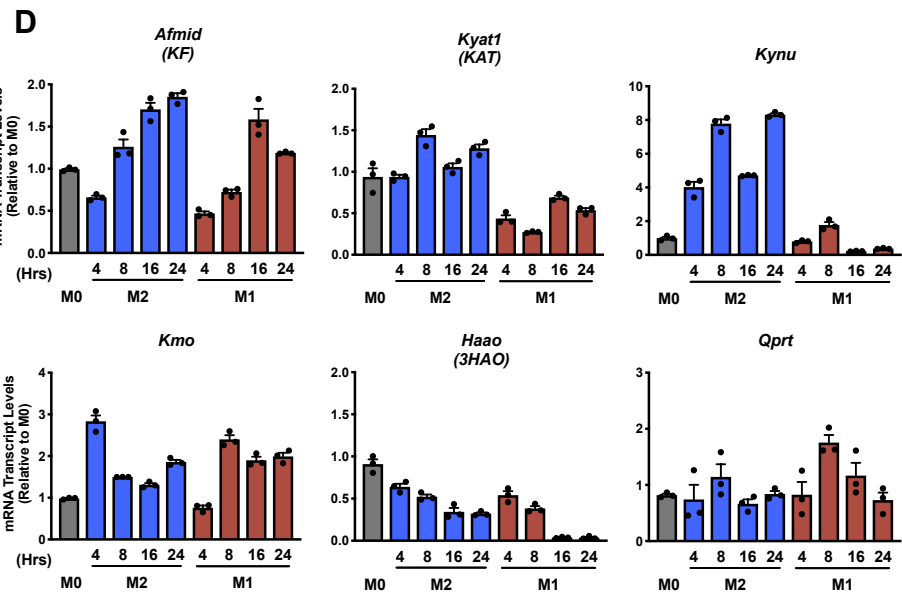

**E** unit: pmol/mg protein

| Macrophage Sample (24 hrs) | Tryptophan | Kynurenine | 3-hydroxy-L-kynurenine | 3-Hydroxy-anthranilic acid | Kynurenine acid | Xanthurenic acid | Anthranilic acid | Picolinic acid | Quinolinic acid |
|----------------------------|------------|------------|------------------------|----------------------------|-----------------|------------------|------------------|----------------|-----------------|
| M0                         | 25.73      | 0.28       | ND                     | ND                         | 2.21            | ND               | ND               | ND             | ND              |
| M0                         | 24.69      | 0.26       | ND                     | ND                         | 2.11            | ND               | ND               | ND             | ND              |
| M0                         | 24.57      | 0.25       | ND                     | ND                         | 2.3             | ND               | ND               | ND             | ND              |
| M2                         | 9.43       | 0.17       | ND                     | ND                         | 0.84            | ND               | ND               | ND             | ND              |
| M2                         | 11.08      | 0.19       | ND                     | ND                         | 0.96            | ND               | ND               | ND             | ND              |
| M2                         | 9.37       | 0.39       | ND                     | ND                         | 0.86            | ND               | ND               | ND             | ND              |
| M1                         | 640        | 10.71      | ND                     | ND                         | 42.89           | ND               | ND               | ND             | ND              |
| M1                         | 523.94     | 9.42       | ND                     | ND                         | 43.94           | ND               | ND               | ND             | ND              |
| M1                         | 603.24     | 7.01       | ND                     | ND                         | 51.57           | ND               | ND               | ND             | ND              |

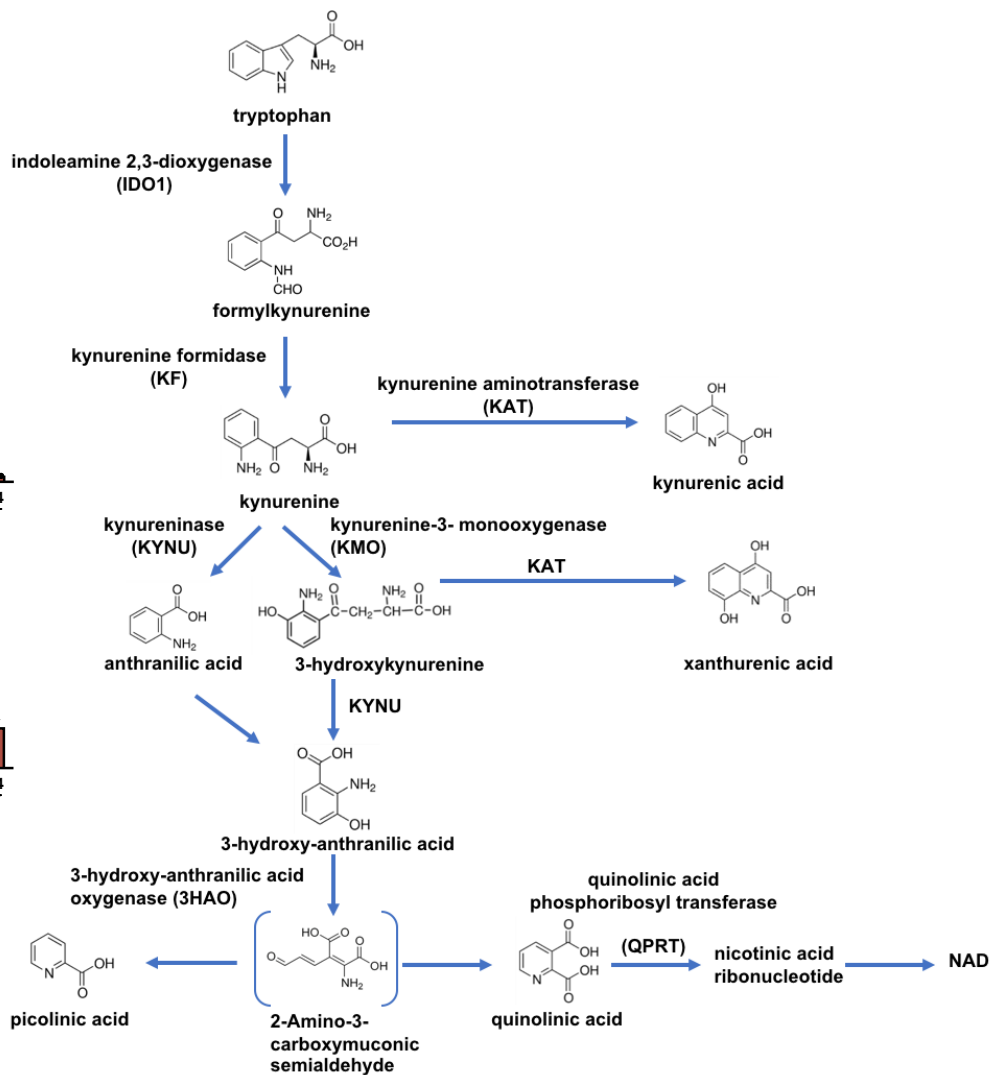

# Sup Figure 2

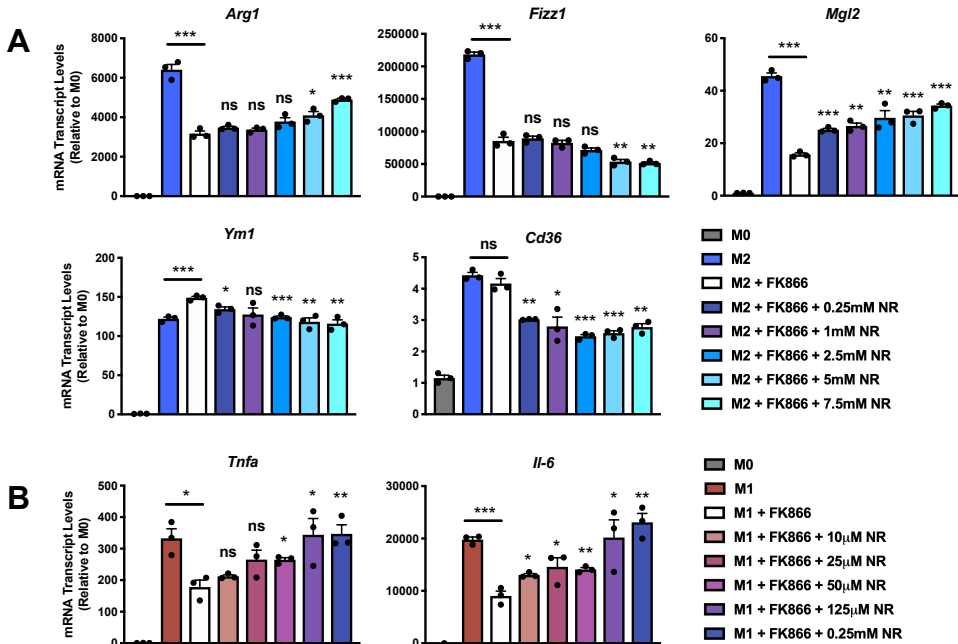

# Sup Figure 3

## A

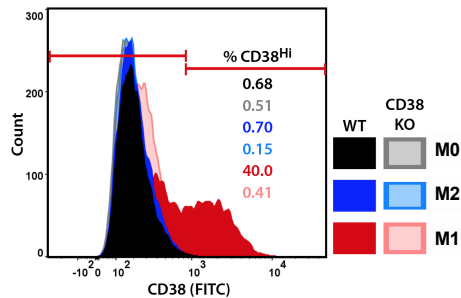

## B

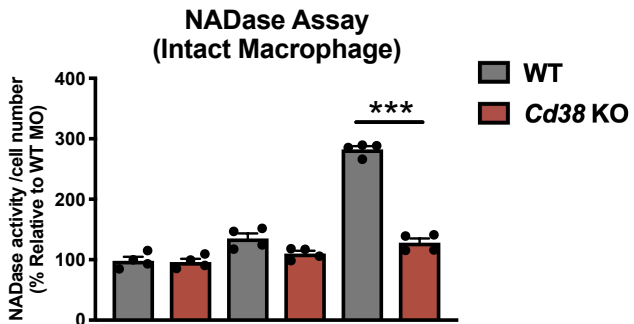

## C

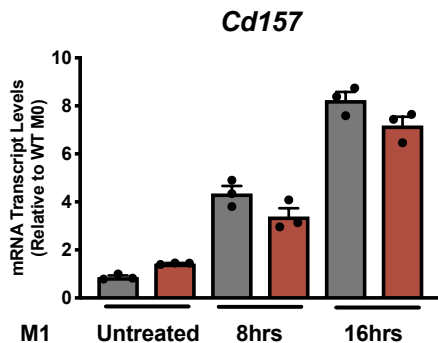

## D

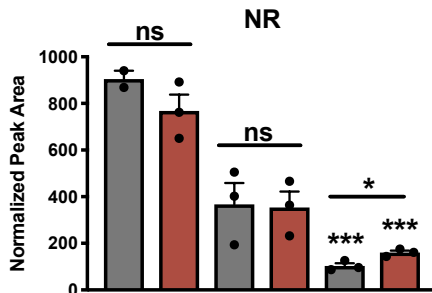

# Sup Figure 4

**A**

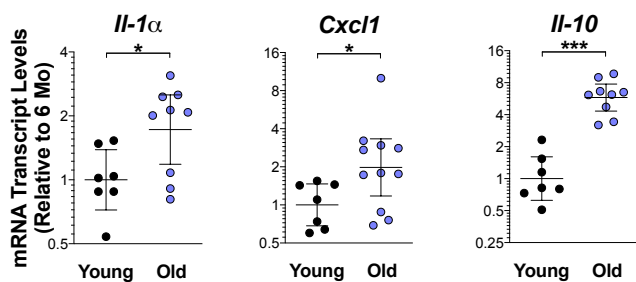

**B**

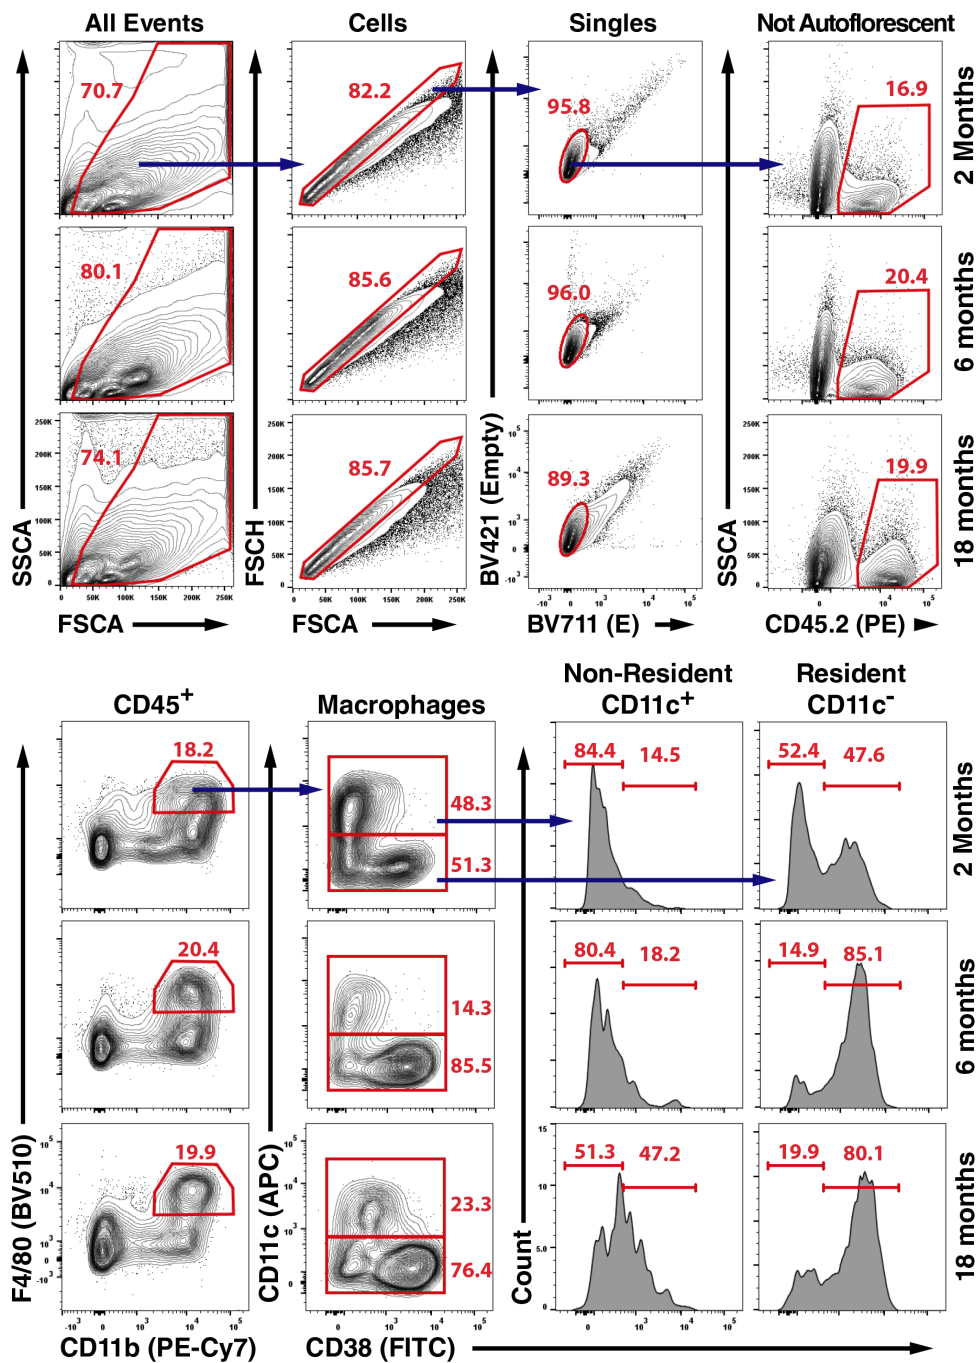

**C**

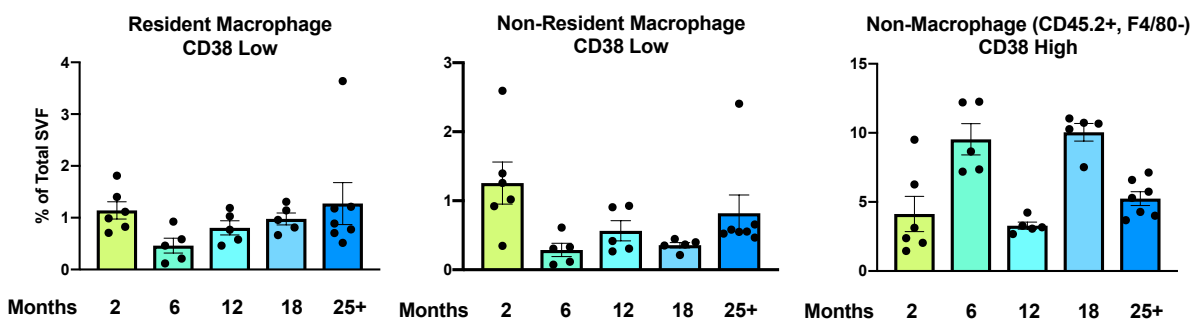



# Sup Figure 6

## A

### Liver Hepatocytes

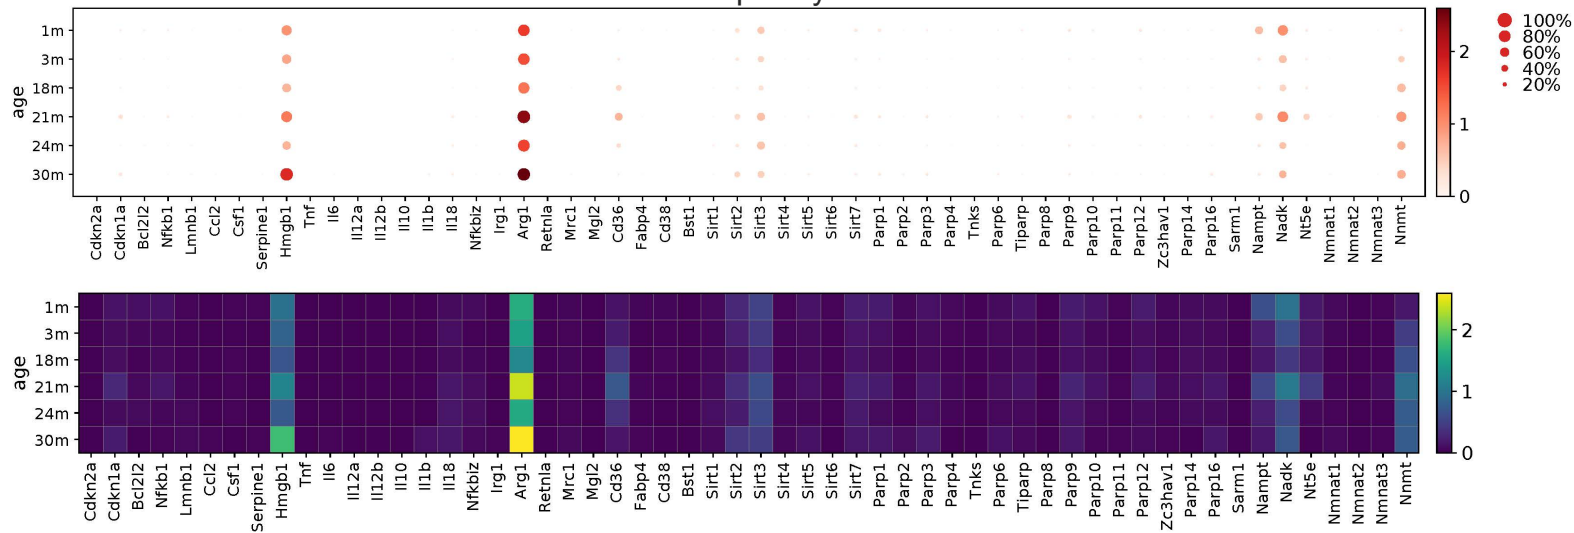

## B

### Liver Endothelial Cells

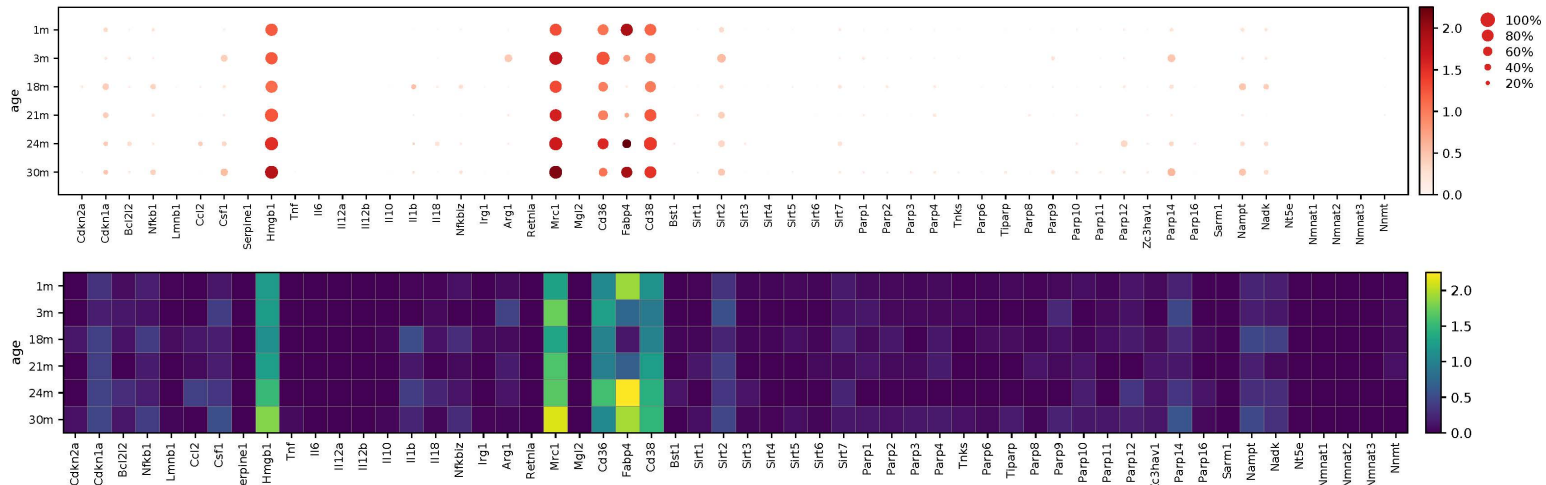

Supplement: Supplementary file [file media-1.pdf]
